# Supplementary material for: Short-Term and Medium-Term Impact of Retirement on Sport Activity, Self-Reported Health, and Social Activity of Women and Men in Poland
Source: Hindawi journal article supplement (doi:10.1155/2019/8383540), 2019-04-11
Supplement: f1 [file 8383540.f1.pdf]

## Annex 1. Questions from the Social Diagnosis utilized in the analysis

| Variable                          | Question                                        | Possible answers                                                                                                                                                                                                                                                                                                                                                                                                                                                                                                                                                                                                                                                                                                                                                                                                                                                                                                                                                                                                                                                                                                                                                                                                                                                                                                                                                                                                                                                                                                                                                                                                                                                                                                                                                                                                                                                                                                                               |
|-----------------------------------|-------------------------------------------------|------------------------------------------------------------------------------------------------------------------------------------------------------------------------------------------------------------------------------------------------------------------------------------------------------------------------------------------------------------------------------------------------------------------------------------------------------------------------------------------------------------------------------------------------------------------------------------------------------------------------------------------------------------------------------------------------------------------------------------------------------------------------------------------------------------------------------------------------------------------------------------------------------------------------------------------------------------------------------------------------------------------------------------------------------------------------------------------------------------------------------------------------------------------------------------------------------------------------------------------------------------------------------------------------------------------------------------------------------------------------------------------------------------------------------------------------------------------------------------------------------------------------------------------------------------------------------------------------------------------------------------------------------------------------------------------------------------------------------------------------------------------------------------------------------------------------------------------------------------------------------------------------------------------------------------------------|
| Treatment variable:<br>Retirement | Based on Source of income: main and additional  | 11 permanent paid employment in the public sector 12 permanent paid employment in the private sector 13 temporary paid employment in the public sector 14 temporary paid employment in the private sector 15 use of an agricultural holding 16 helping in an agricultural holding 17 employer outside an individual holding in agriculture 18 permanent work for one's own account (also self-employment) 19 temporary work for one's own account 20 Helping in work for one's own account 21 old age pension (apart from the agricultural social insurance system) 22 old age pensions for individual farmers (under insurance in the Agricultural Social Insurance Fund, KRUS) 23 disability pensions 24 family pensions 25 maternity benefits 26 unemployment benefits 27 other benefits from the Labour Fund 28 allowance for persons on child care leaves (former child care benefits) 29 other social insurance benefits (such as child birth allowance, funeral allowance, sickness allowance) 30 family benefits and allowance in accordance with the Act on Family Benefits of 2003, as amended, housing allowance 31 social assistance benefits 32 other social assistance benefits (such as benefits for persons bringing up children, special purpose benefits and extraordinary benefits) 33 children maintenance 34 other income of a social benefit nature (including scholarships) 35 income from own property (interest, dividends, etc.) 36 income from the rental of a house, apartment or garage 37 foreign old age and disability pensions 38 benefits under a voluntary sickness and accident insurance system 39 compensation under other insurance schemes 40 donations, maintenance from private persons 41 other income 42 other revenues (sale of property, savings, credits) 43 being supported by other household members<br>Recorded as binary variable ((main = (21 or 22) and (additional >20 or empty)) as 1) |
| Sport activity                    | Do you practice any sport or physical activity? | 1. no, I do not practice any sport or physical activity<br>2. aerobics<br>3. running/jogging/nordic walking<br>4. gym<br>5. cycling<br>6. skiing or other winter sports<br>7. swimming<br>8. football or other team sports                                                                                                                                                                                                                                                                                                                                                                                                                                                                                                                                                                                                                                                                                                                                                                                                                                                                                                                                                                                                                                                                                                                                                                                                                                                                                                                                                                                                                                                                                                                                                                                                                                                                                                                     |

|                               |                                                                                                                                                                                  |                                                                                                                                                                                                                                                             |
|-------------------------------|----------------------------------------------------------------------------------------------------------------------------------------------------------------------------------|-------------------------------------------------------------------------------------------------------------------------------------------------------------------------------------------------------------------------------------------------------------|
|                               |                                                                                                                                                                                  | 9. yoga<br>10. martial arts<br>11. another sport or type of physical activity.<br>Recorded as binary variable (2-11 as 1)<br>Yes; No                                                                                                                        |
| Too much alcohol              | In the last year, have you drunk too much alcohol                                                                                                                                |                                                                                                                                                                                                                                                             |
| Friends met regularly         | How many persons you contact with regularly for social and personal reasons (at least several times a year), among friends?                                                      | Open-ended question (integer)                                                                                                                                                                                                                               |
| Acquaintances met regularly   | How many persons you contact with regularly for social and personal reasons (at least several times a year), among acquaintances (work/school colleagues, neighbors and others)? | Open-ended question (integer)                                                                                                                                                                                                                               |
| Friends                       | How many persons do you consider to be your friends?                                                                                                                             | Open-ended question (integer)                                                                                                                                                                                                                               |
| Work for local society        | During the last two years, have you been involved in any actions for the benefit of your local community (gmina, housing estate, town or neighborhood)?                          | Yes; No                                                                                                                                                                                                                                                     |
| Member of organisations       | Are you a member of any organizations, associations, parties, committees, councils, religious groups or clubs?                                                                   | 1. Yes, one; 2. Yes, two; 3. Yes, three or more; 4. No (4 recoded as 0, 1 as 1, 2 as 2, 3 as 3)                                                                                                                                                             |
| Member of a sports club       | Do you currently take active part in sports club?                                                                                                                                | Yes; No                                                                                                                                                                                                                                                     |
| Took part in public meeting   | Have you attended any public meeting in the last year (but not at your workplace)?                                                                                               | Yes; No                                                                                                                                                                                                                                                     |
| Voluntary activities          | Have you in the last year done any voluntary work for people outside the family or for a social organization?                                                                    | 1. Yes, often; 2. Yes, rarely; 3. No<br>(recoded as a binary variable, 1 as 1, 2 as 1, 3 as 0; for 2011 only 1: Yes and 2: No)                                                                                                                              |
| Lust for life                 | At present, how strong is your willingness to live?                                                                                                                              | 1: I do not want to live at all, 2, 3,..., 10: I want to live very much                                                                                                                                                                                     |
| Losing interest in sex        | Read the four statements in each point carefully and then choose one that describes best your feelings and beliefs during the last month                                         | 0. I have not noticed any recent change in my interest in sex; 1. I am less interested in sex than I used to be.; 2. I am much less interested in sex now.; 3. I have lost interest in sex completely.<br>Recorded as a binary variable (1-3 recoded as 1). |
| Dissatisfaction with sex life | To what extent are you satisfied with your sex life?                                                                                                                             | 1: very satisfied, 2: satisfied, ... 6: very not satisfied, 7: not applicable                                                                                                                                                                               |
| BMI                           | Calculated based on answers to open-ended questions: How tall are you? (cm); What is your weight? (kg)                                                                           |                                                                                                                                                                                                                                                             |
| Dissatisfaction with health   | To what extent are you satisfied with your health condition?                                                                                                                     | 1: very satisfied; 2: satisfied; ... 6: very not satisfied, 7: not applicable                                                                                                                                                                               |
| Problems with sleeping        | Read the four statements in each point carefully and then choose one that describes best your feelings and beliefs during the last month.                                        | 0. I sleep at least as well as I used to.<br>1. I do not sleep as well as I used to.                                                                                                                                                                        |

|                            |                                                                                                                                                                                    |                                                                                                                                                                                                                                                                                                                                                                                                                                                                                                                                                                                                                                                                                                                                                                                                                                                                                                                                                                                                        |
|----------------------------|------------------------------------------------------------------------------------------------------------------------------------------------------------------------------------|--------------------------------------------------------------------------------------------------------------------------------------------------------------------------------------------------------------------------------------------------------------------------------------------------------------------------------------------------------------------------------------------------------------------------------------------------------------------------------------------------------------------------------------------------------------------------------------------------------------------------------------------------------------------------------------------------------------------------------------------------------------------------------------------------------------------------------------------------------------------------------------------------------------------------------------------------------------------------------------------------------|
| Digestion worries          | Read the four statements in each point carefully and then choose one that describes best your feelings and beliefs during the last month.                                          | <p>2. In the morning, I wake up 1-2 hours earlier and find it difficult to fall asleep again.</p> <p>3. I wake up several hours too early and I can't get back to sleep.</p> <p>Recoded as a binary variable (2 and 3 as 1).</p> <p>0. I am not worried about my health any more than I used to be.</p> <p>1. I am worried about such ailments as: stomach pains, upset stomach, or constipation.</p> <p>2. I am very worried about my health; I think about it constantly.</p> <p>3. My health condition is so worrying that I cannot think of anything else.</p> <p>Recoded as a binary variable (1 as 1).</p> <p>0. I am not worried about my health any more than I used to be.</p> <p>1. I am worried about such ailments as: stomach pains, upset stomach, or constipation.</p> <p>2. I am very worried about my health; I think about it constantly.</p> <p>3. My health condition is so worrying that I cannot think of anything else.</p> <p>Recoded as a binary variable (2 and 3 as 1).</p> |
| Significant health worries | Read the four statements in each point carefully and then choose one that describes best your feelings and beliefs during the last month.                                          | <p>1. Often</p> <p>2. Once or twice</p> <p>3. Never</p> <p>Recoded as a binary variable (1 as 1).</p> <p>1. Often</p> <p>2. Once or twice</p> <p>3. Never</p> <p>Recoded as a binary variable (2 as 1).</p>                                                                                                                                                                                                                                                                                                                                                                                                                                                                                                                                                                                                                                                                                                                                                                                            |
| Health problems often      | In the recent months your health problems have made it difficult for you to perform everyday activities or to take part in other activities?                                       | <p>1. Often</p> <p>2. Once or twice</p> <p>3. Never</p> <p>Recoded as a binary variable (1 as 1).</p>                                                                                                                                                                                                                                                                                                                                                                                                                                                                                                                                                                                                                                                                                                                                                                                                                                                                                                  |
| Health problems sometimes  | In the recent months your health problems have made it difficult for you to perform everyday activities or to take part in other activities?                                       | <p>1. Often</p> <p>2. Once or twice</p> <p>3. Never</p> <p>Recoded as a binary variable (2 as 1).</p>                                                                                                                                                                                                                                                                                                                                                                                                                                                                                                                                                                                                                                                                                                                                                                                                                                                                                                  |
| Physical problems          | In the recent months you have suffered from ailments, such as bones aching or shortness of breath, etc., which has made it difficult for you to leave home, climb the stairs, etc? | <p>1. Often</p> <p>2. Once or twice</p> <p>3. Never</p> <p>Recoded as a binary variable (1 as 1)</p>                                                                                                                                                                                                                                                                                                                                                                                                                                                                                                                                                                                                                                                                                                                                                                                                                                                                                                   |
| Seriously ill              | In the last year have you been seriously ill?                                                                                                                                      | Yes; No                                                                                                                                                                                                                                                                                                                                                                                                                                                                                                                                                                                                                                                                                                                                                                                                                                                                                                                                                                                                |
| Headaches                  | Below you will find a list of some ailments. Please specify whether you suffered from them LAST MONTH: strong headaches                                                            | <p>1. I did not suffer.</p> <p>2. I suffered for less than 15 days</p> <p>3. I suffered at least for half a month</p> <p>Recoded as a binary variable (2 and 3 as 1)</p>                                                                                                                                                                                                                                                                                                                                                                                                                                                                                                                                                                                                                                                                                                                                                                                                                               |
| Stomach pains              | (as above): stomach pains or flatulence                                                                                                                                            | as above                                                                                                                                                                                                                                                                                                                                                                                                                                                                                                                                                                                                                                                                                                                                                                                                                                                                                                                                                                                               |

|                                               |                                                                                                                                                                                                                                                       |                                                                                                                                                                                                                                                                                                                                                                                                                                                                                                                                                                                                                                                                                                                                                                                         |
|-----------------------------------------------|-------------------------------------------------------------------------------------------------------------------------------------------------------------------------------------------------------------------------------------------------------|-----------------------------------------------------------------------------------------------------------------------------------------------------------------------------------------------------------------------------------------------------------------------------------------------------------------------------------------------------------------------------------------------------------------------------------------------------------------------------------------------------------------------------------------------------------------------------------------------------------------------------------------------------------------------------------------------------------------------------------------------------------------------------------------|
| Pain in neck or arm muscles                   | (as above): pain or tension in the neck or arm muscles                                                                                                                                                                                                | as above                                                                                                                                                                                                                                                                                                                                                                                                                                                                                                                                                                                                                                                                                                                                                                                |
| Chest or heart pains                          | (as above): chest or heart pains                                                                                                                                                                                                                      | as above                                                                                                                                                                                                                                                                                                                                                                                                                                                                                                                                                                                                                                                                                                                                                                                |
| Dry mouth or throat                           | (as above): dry mouth or throat                                                                                                                                                                                                                       | as above                                                                                                                                                                                                                                                                                                                                                                                                                                                                                                                                                                                                                                                                                                                                                                                |
| Sweating                                      | (as above): attacks of excessive sweating                                                                                                                                                                                                             | as above                                                                                                                                                                                                                                                                                                                                                                                                                                                                                                                                                                                                                                                                                                                                                                                |
| Shortness of breath                           | (as above): shortness of breath                                                                                                                                                                                                                       | as above                                                                                                                                                                                                                                                                                                                                                                                                                                                                                                                                                                                                                                                                                                                                                                                |
| Body pains                                    | (as above): pains throughout the whole body                                                                                                                                                                                                           | as above                                                                                                                                                                                                                                                                                                                                                                                                                                                                                                                                                                                                                                                                                                                                                                                |
| Palpitation                                   | (as above): accelerated heartbeat (palpitation)                                                                                                                                                                                                       | as above                                                                                                                                                                                                                                                                                                                                                                                                                                                                                                                                                                                                                                                                                                                                                                                |
| Shivers or convulsions                        | (as above): shivers or convulsions                                                                                                                                                                                                                    | as above                                                                                                                                                                                                                                                                                                                                                                                                                                                                                                                                                                                                                                                                                                                                                                                |
| Pressure on bladder                           | (as above): pressure on the bladder and more frequent urinating                                                                                                                                                                                       | as above                                                                                                                                                                                                                                                                                                                                                                                                                                                                                                                                                                                                                                                                                                                                                                                |
| Tiredness                                     | (as above): a feeling tiredness not associated with work                                                                                                                                                                                              | as above                                                                                                                                                                                                                                                                                                                                                                                                                                                                                                                                                                                                                                                                                                                                                                                |
| Constipation                                  | (as above): constipation                                                                                                                                                                                                                              | as above                                                                                                                                                                                                                                                                                                                                                                                                                                                                                                                                                                                                                                                                                                                                                                                |
| Nosebleeds                                    | (as above): nosebleeds                                                                                                                                                                                                                                | as above                                                                                                                                                                                                                                                                                                                                                                                                                                                                                                                                                                                                                                                                                                                                                                                |
| Blood pressure                                | (as above): sudden changes of blood pressure                                                                                                                                                                                                          | as above                                                                                                                                                                                                                                                                                                                                                                                                                                                                                                                                                                                                                                                                                                                                                                                |
| Age                                           | Pre-coded in the database – based on date of birth                                                                                                                                                                                                    |                                                                                                                                                                                                                                                                                                                                                                                                                                                                                                                                                                                                                                                                                                                                                                                         |
| Years of education completed                  | Pre-coded in the database – based on direct question                                                                                                                                                                                                  |                                                                                                                                                                                                                                                                                                                                                                                                                                                                                                                                                                                                                                                                                                                                                                                         |
| Higher Education                              | Based on information on educational attainment pre-coded in the database (1 if higher education with at least a PhD title, higher education with at least an MA degree or an equivalent degree, higher education with an Engineer or Bachelor degree) |                                                                                                                                                                                                                                                                                                                                                                                                                                                                                                                                                                                                                                                                                                                                                                                         |
| Number of adults living in the same household | Calculated based on number of people living in the household at age of at least 20 <sup>1</sup>                                                                                                                                                       |                                                                                                                                                                                                                                                                                                                                                                                                                                                                                                                                                                                                                                                                                                                                                                                         |
| Living in a large city                        | Dummy for cities with more than 500,000 inhabitants (pre-coded)                                                                                                                                                                                       |                                                                                                                                                                                                                                                                                                                                                                                                                                                                                                                                                                                                                                                                                                                                                                                         |
| Living in a rural area                        | Dummy for rural areas (pre-coded)                                                                                                                                                                                                                     |                                                                                                                                                                                                                                                                                                                                                                                                                                                                                                                                                                                                                                                                                                                                                                                         |
|                                               |                                                                                                                                                                                                                                                       | 1 for the persons who have a valid certificate from the Social Insurance Institution (ZUS);<br>2 for the persons who have a valid certificate from the Disability Evaluation Board at the Poviat Centre of Family Support (ZOoN at PCPR);<br>3 for the persons who have a valid certificate from the Social Insurance Institution and ZOoN at PCPR;<br>4 for the persons who have stated that due to disability or disease they have completely or partly limited ability to perform such activities as learning, working or taking care of own household but they do not have a certificate from the medical board;<br>5 disability of children aged below 16;<br>0 other cases;<br>8 not applicable (the person is not a disabled person)<br>Recorded as a binary variable (0-5 as 1) |
| Disability                                    | Disability                                                                                                                                                                                                                                            |                                                                                                                                                                                                                                                                                                                                                                                                                                                                                                                                                                                                                                                                                                                                                                                         |
|                                               |                                                                                                                                                                                                                                                       | 1 unmarried<br>2 married<br>3 widow(er)<br>4 divorced<br>5 legally separated (based on a court decision)                                                                                                                                                                                                                                                                                                                                                                                                                                                                                                                                                                                                                                                                                |
| Marital status                                | Marital status                                                                                                                                                                                                                                        |                                                                                                                                                                                                                                                                                                                                                                                                                                                                                                                                                                                                                                                                                                                                                                                         |

<sup>1</sup> Even though 18 is age of maturity in Poland, 19 has been chosen as the highest age for ‘non-adults’, since most of the high schools students graduate during the summer in a year in which they are 19 years old.

|                            |                                                                                         |                                                                                                                                                                                                                                                                                                                                                                                                                                                                                                                                                                                                                                                                                                                                                                                                                                                                                                                                                                                                                                                                                                                                         |
|----------------------------|-----------------------------------------------------------------------------------------|-----------------------------------------------------------------------------------------------------------------------------------------------------------------------------------------------------------------------------------------------------------------------------------------------------------------------------------------------------------------------------------------------------------------------------------------------------------------------------------------------------------------------------------------------------------------------------------------------------------------------------------------------------------------------------------------------------------------------------------------------------------------------------------------------------------------------------------------------------------------------------------------------------------------------------------------------------------------------------------------------------------------------------------------------------------------------------------------------------------------------------------------|
| Permanent employment       | What is the type of work this person performs at his/her main job?                      | <p>6 practically separated (the spouses do not live together without a court decision).<br/>         Recoded as binary (2 as 1)<br/>         1. based on an employment contract for a specified period of time (apart from the contracts listed below, being non-standard forms of employment (6-11), and for a period longer than one year)<br/>         2. based on an employment contract for an unspecified period of time<br/>         3. self-employed entrepreneur hiring employers<br/>         4. self-employed<br/>         5. helping in a family business without pay<br/>         6. temporary job (based on fixed-term employment contracts, such as replacement contracts, contracts for specific work)<br/>         7. other short-term contracts (such as summer traineeships, employment contracts for a period shorter than one year)<br/>         8. trial period employment<br/>         9. paid employment on the basis of a civil law contract (contract of mandate, contract for specific work)<br/>         10. paid employment without a formal contract or with an oral agreement<br/>         11. other</p> |
| Inactive                   | During the last 4 weeks, has this person been seeking a job or a different job?         | <p>Recoded as binary (2 as 1)<br/>         1 YES and I am currently unemployed<br/>         2 YES and I am currently employed<br/>         3 NO and I am currently unemployed but I have already found a job<br/>         4 NO and I am currently unemployed<br/>         5 NO and I am currently employed</p>                                                                                                                                                                                                                                                                                                                                                                                                                                                                                                                                                                                                                                                                                                                                                                                                                          |
| Higher education of father | What was the educational attainment of your father (or main guardian) when you were 14? | <p>Recoded as binary (4 as 1)<br/>         1 primary not completed<br/>         2 primary<br/>         3 vocational<br/>         4 secondary not completed<br/>         5 secondary vocational<br/>         6 secondary general<br/>         7 higher not completed (including post-secondary)<br/>         8 higher</p>                                                                                                                                                                                                                                                                                                                                                                                                                                                                                                                                                                                                                                                                                                                                                                                                                |

|                          |                                                                                                                                                |                                                                                                                                                                                                                                                                                                                             |
|--------------------------|------------------------------------------------------------------------------------------------------------------------------------------------|-----------------------------------------------------------------------------------------------------------------------------------------------------------------------------------------------------------------------------------------------------------------------------------------------------------------------------|
| General trust            | In general, do you believe that most people can be trusted or are you of the opinion that one can never be too careful with people?            | 9 I do not know.<br>Recorded as binary (7 and 8 as 1).<br>1 most people can be trusted<br>2 one cannot be too careful in dealing with people<br>3 it is hard to say<br>Recorded as binary (1 as 1).                                                                                                                         |
| Trust towards Parliament | Do you trust: Sejm                                                                                                                             | 1 yes<br>2 no<br>3 I have no opinion<br>Recorded as binary (1 as 1).                                                                                                                                                                                                                                                        |
| Health benefits          | In the last year, have you used the services of healthcare units paid for by the employer (under a medical services plan or health insurance)? | Yes; No<br>Recorded as binary (1 as 1).                                                                                                                                                                                                                                                                                     |
| Insomnia                 | Read the four statements in each point carefully and then choose one that describes best your feelings and beliefs during the last month       | 0 I have not experienced any change in my sleeping pattern.<br>1 I do not sleep as well as I used to.<br>2 In the morning, I wake up 1-2 hours earlier and find it difficult to fall asleep again.<br>3 I wake up several hours too early and I can't get back to sleep.<br>Recorded as binary variable (2-3 recoded as 1). |
| High energy              | Please specify to what extent these statements match your beliefs and attitudes:<br>I have a lot of energy.                                    | 1 Definitely yes<br>2 Yes<br>3 Rather yes<br>4 Neither yer nor not<br>5 Rather not<br>6 No<br>7 Definitely not<br>Recorded as binary (1,2 and 3 as 1)                                                                                                                                                                       |

Notes: Based on Social Diagnosis, questionnaires. [www.diagnoza.com](http://www.diagnoza.com) [downloaded 19.03.2017].

## Annex 2. Descriptive statistics for the outcome and balancing variables

| Variable                      | Year | Treated men         | Non-treated men       | Treated women       | Non-treated women     |
|-------------------------------|------|---------------------|-----------------------|---------------------|-----------------------|
| Sport activity                | 2011 | 0.324 (179)         | 0.258 (2,298)         | 0.261 (249)         | 0.274 (2,311)         |
|                               | 2013 | 0.272 (187)         | 0.272 (2,321)         | 0.286 (258)         | 0.297 (2,323)         |
|                               | 2015 | 0.268 (108)         | 0.235 (1,542)         | 0.283 (180)         | 0.277 (1,502)         |
| Too much alcohol              | 2011 | 0.090 (209)         | 0.109 (2,679)         | 0.007 (275)         | 0.016 (2,455)         |
|                               | 2013 | 0.027 (187)         | 0.070 (2,331)         | 0.000 (258)         | 0.013 (2,329)         |
|                               | 2015 | 0.046 (108)         | 0.107 (1,555)         | 0.000 (184)         | 0.021 (1,533)         |
| Friends met regularly         | 2011 | 4.850 ± 4.512 (174) | 5.098 ± 5.280 (2,287) | 4.863 ± 5.283 (249) | 4.873 ± 4.985 (2,298) |
|                               | 2013 | 5.423 ± 5.933 (184) | 4.912 ± 5.624 (2,305) | 4.714 ± 5.349 (256) | 4.511 ± 4.420 (2,306) |
|                               | 2015 | 5.574 ± 5.595 (108) | 4.747 ± 5.059 (1,547) | 4.429 ± 4.007 (184) | 4.411 ± 4.125 (1,525) |
| Acquaintances met regularly   | 2011 | 6.28 ± 6.105 (175)  | 6.145 ± 7.229 (2,260) | 5.654 ± 5.999 (246) | 5.757 ± 7.058 (2,264) |
|                               | 2013 | 5.673 ± 6.320 (184) | 5.964 ± 7.570 (2,290) | 5.388 ± 6.442 (250) | 5.358 ± 5.915 (2,292) |
|                               | 2015 | 5.308 ± 5.457 (107) | 6.125 ± 8.070 (1,544) | 4.927 ± 5.460 (180) | 5.260 ± 5.924 (1,514) |
| Friends                       | 2011 | 7.717 ± 7.449 (177) | 7.042 ± 7.827 (2,286) | 7.584 ± 8.109 (248) | 6.588 ± 6.707 (2,306) |
|                               | 2013 | 7.194 ± 8.239 (185) | 6.278 ± 6.518 (2,305) | 6.883 ± 6.854 (258) | 6.061 ± 5.577 (2,303) |
|                               | 2015 | 7.222 ± 7.660 (108) | 6.340 ± 6.900 (1,549) | 6.721 ± 7.043 (183) | 6.033 ± 5.698 (1,529) |
| Work for local society        | 2011 | 0.186 (209)         | 0.181 (2,679)         | 0.174 (275)         | 0.158 (2,455)         |
|                               | 2013 | 0.155 (187)         | 0.188 (2,331)         | 0.151 (258)         | 0.151 (2,329)         |
|                               | 2015 | 0.204 (108)         | 0.181 (1,555)         | 0.125 (184)         | 0.147 (1,533)         |
| Member of organisations       | 2011 | 0.210 ± 0.522 (209) | 0.214 ± 0.555 (2,679) | 0.185 ± 0.473 (275) | 0.192 ± 0.481 (2,455) |
|                               | 2013 | 0.155 ± 0.443 (187) | 0.216 ± 0.557 (2,331) | 0.155 ± 0.466 (258) | 0.177 ± 0.493 (2,329) |
|                               | 2015 | 0.185 ± 0.566 (108) | 0.197 ± 0.523 (1,555) | 0.130 ± 0.411 (184) | 0.179 ± 0.485 (1,533) |
| Member of a sports club       | 2013 | 0.005 (187)         | 0.014 (2,331)         | 0.000 (258)         | 0.004 (2,329)         |
|                               | 2015 | 0.000 (108)         | 0.015 (1,555)         | 0.000 (184)         | 0.002 (1,533)         |
| Took part in public meeting   | 2011 | 0.301 (209)         | 0.281 (2,679)         | 0.229 (275)         | 0.231 (2,455)         |
|                               | 2013 | 0.176 (187)         | 0.203 (2,331)         | 0.120 (258)         | 0.136 (2,329)         |
|                               | 2015 | 0.213 (108)         | 0.253 (1,555)         | 0.179 (184)         | 0.180 (1,533)         |
| Voluntary activities          | 2011 | 0.248 (209)         | 0.223 (2,679)         | 0.152 (275)         | 0.186 (2,455)         |
|                               | 2013 | 0.273 (187)         | 0.319 (2,331)         | 0.205 (258)         | 0.249 (2,329)         |
|                               | 2015 | 0.278 (108)         | 0.324 (1,555)         | 0.228 (184)         | 0.256 (1,533)         |
| Lust for life                 | 2011 | 8.335 ± 1.851 (179) | 8.369 ± 1.787 (2,313) | 8.488 ± 1.917 (252) | 8.447 ± 1.853 (2,323) |
|                               | 2013 | 8.283 ± 1.857 (187) | 8.367 ± 1.820 (2,329) | 8.511 ± 1.914 (258) | 8.489 ± 1.800 (2,325) |
|                               | 2015 | 8.601 ± 1.605 (108) | 8.424 ± 1.723 (1,554) | 8.491 ± 1.845 (183) | 8.564 ± 1.678 (1,530) |
| Losing interest in sex        | 2011 | 0.770 (209)         | 0.606 (2,679)         | 0.872 (275)         | 0.789 (2,455)         |
|                               | 2013 | 0.781 (187)         | 0.592 (2,331)         | 0.849 (258)         | 0.804 (2,329)         |
|                               | 2015 | 0.750 (108)         | 0.648 (1,555)         | 0.918 (184)         | 0.830 (1,533)         |
| Dissatisfaction with sex life | 2011 | 3.516 ± 1.747 (178) | 3.248 ± 1.614 (2,298) | 4.270 ± 2.023 (251) | 3.743 ± 1.932 (2,295) |
|                               | 2013 | 3.729 ± 1.754 (185) | 3.427 ± 1.684 (2,313) | 4.445 ± 2.074 (256) | 3.891 ± 1.963 (2,303) |
|                               | 2015 | 3.588 ± 1.715 (107) | 3.458 ± 1.697 (1,548) | 4.782 ± 2.108 (184) | 4.069 ± 2.000 (1,515) |
| Marital status                | 2011 | 0.861 (209)         | 0.819 (2,679)         | 0.690 (275)         | 0.721 (2,455)         |
|                               | 2013 | 0.871 (187)         | 0.818 (2,331)         | 0.667 (258)         | 0.712 (2,329)         |

|                             |      |                         |                           |                        |                          |
|-----------------------------|------|-------------------------|---------------------------|------------------------|--------------------------|
|                             | 2015 | 0.852 (108)             | 0.829 (1,555)             | 0.636 (184)            | 0.699 (1,533)            |
|                             | 2011 | 27.91 ± 4.833<br>(176)  | 27.59 ± 4.176<br>(2,287)  | 27.91 ± 4.935<br>(250) | 26.93 ± 4.693<br>(2,310) |
| BMI                         | 2013 | 27.724 ±<br>4.347 (184) | 27.723 ± 4.195<br>(2,297) | 27.47 ± 4.814<br>(257) | 27.077 ± 4.68<br>(2,302) |
|                             | 2015 | 27.81 ± 3.972<br>(108)  | 27.87 ± 4.120<br>(1,547)  | 27.71 ± 4.497<br>(184) | 27.44 ± 4.914<br>(1,520) |
|                             | 2011 | 3.547 ± 1.333<br>(179)  | 3.176 ± 1.264<br>(2,311)  | 3.386 ± 1.289<br>(251) | 3.251 ± 1.241<br>(2,321) |
| Dissatisfaction with health | 2013 | 3.326 ± 1.358<br>(187)  | 3.202 ± 1.260<br>(2,327)  | 3.404 ± 1.307<br>(257) | 3.272 ± 1.256<br>(2,324) |
|                             | 2015 | 3.25 ± 1.238<br>(108)   | 3.208 ± 1.248<br>(1,552)  | 3.393 ± 1.212<br>(183) | 3.308 ± 1.228<br>(1,527) |
|                             | 2011 | 0.157 (209)             | 0.099 (2,679)             | 0.178 (275)            | 0.098 (2,455)            |
| Problems with sleeping      | 2013 | 0.144 (187)             | 0.116 (2,331)             | 0.178 (258)            | 0.112 (2,329)            |
|                             | 2015 | 0.148 (108)             | 0.091 (1,555)             | 0.168 (184)            | 0.101 (1,533)            |
|                             | 2011 | 0.258 (209)             | 0.256 (2,679)             | 0.327 (275)            | 0.315 (2,455)            |
| Digestion worries           | 2013 | 0.272 (187)             | 0.309 (2,331)             | 0.360 (258)            | 0.359 (2,329)            |
|                             | 2015 | 0.333 (108)             | 0.336 (1,555)             | 0.336 (184)            | 0.346 (1,533)            |
|                             | 2011 | 0.210 (209)             | 0.130 (2,679)             | 0.178 (275)            | 0.168 (2,455)            |
| Significant health worries  | 2013 | 0.240 (187)             | 0.151 (2,331)             | 0.205 (258)            | 0.168 (2,329)            |
|                             | 2015 | 0.148 (108)             | 0.149 (1,555)             | 0.206 (184)            | 0.165 (1,533)            |
|                             | 2011 | 0.196 (209)             | 0.122 (2,679)             | 0.152 (275)            | 0.147 (2,455)            |
| Health problems often       | 2013 | 0.208 (187)             | 0.138 (2,331)             | 0.186 (258)            | 0.157 (2,329)            |
|                             | 2015 | 0.120 (108)             | 0.135 (1,555)             | 0.152 (184)            | 0.157 (1,533)            |
|                             | 2011 | 0.444 (209)             | 0.439 (2,679)             | 0.501 (275)            | 0.496 (2,455)            |
| Health problems sometimes   | 2013 | 0.502 (187)             | 0.534 (2,331)             | 0.569 (258)            | 0.549 (2,329)            |
|                             | 2015 | 0.611 (108)             | 0.531 (1,555)             | 0.559 (184)            | 0.536 (1,533)            |
|                             | 2011 | 0.248 (209)             | 0.154 (2,679)             | 0.174 (275)            | 0.202 (2,455)            |
| Physical problems           | 2013 | 0.240 (187)             | 0.177 (2,331)             | 0.213 (258)            | 0.217 (2,329)            |
|                             | 2015 | 0.194 (108)             | 0.181 (1,555)             | 0.211 (184)            | 0.196 (1,533)            |
|                             | 2011 | 0.205 (209)             | 0.130 (2,679)             | 0.200 (275)            | 0.147 (2,455)            |
| Seriously ill               | 2013 | 0.240 (187)             | 0.155 (2,331)             | 0.151 (258)            | 0.160 (2,329)            |
|                             | 2015 | 0.203 (108)             | 0.151 (1,555)             | 0.184 (184)            | 0.153 (1,533)            |
|                             | 2011 | 0.267 (209)             | 0.274 (2,679)             | 0.385 (275)            | 0.421 (2,455)            |
| Headaches                   | 2013 | 0.358 (187)             | 0.354 (2,331)             | 0.496 (258)            | 0.499 (2,329)            |
|                             | 2015 | 0.324 (108)             | 0.344 (1,555)             | 0.483 (184)            | 0.483 (1,533)            |
|                             | 2011 | 0.153 (209)             | 0.208 (2,679)             | 0.287 (275)            | 0.328 (2,455)            |
| Stomach pains               | 2013 | 0.267 (187)             | 0.261 (2,331)             | 0.360 (258)            | 0.379 (2,329)            |
|                             | 2015 | 0.342 (108)             | 0.274 (1,555)             | 0.353 (184)            | 0.384 (1,533)            |
|                             | 2011 | 0.425 (209)             | 0.381 (2,679)             | 0.396 (275)            | 0.407 (2,455)            |
| Pain in neck or arm muscles | 2013 | 0.550 (187)             | 0.541 (2,331)             | 0.573 (258)            | 0.554 (2,329)            |
|                             | 2015 | 0.537 (108)             | 0.535 (1,555)             | 0.635 (184)            | 0.574 (1,533)            |
|                             | 2011 | 0.258 (209)             | 0.226 (2,679)             | 0.236 (275)            | 0.223 (2,455)            |
| Chest or heart pains        | 2013 | 0.331 (187)             | 0.292 (2,331)             | 0.313 (258)            | 0.278 (2,329)            |
|                             | 2015 | 0.287 (108)             | 0.276 (1,555)             | 0.347 (184)            | 0.270 (1,533)            |
|                             | 2011 | 0.234 (209)             | 0.197 (2,679)             | 0.218 (275)            | 0.225 (2,455)            |
| Dry mouth or throat         | 2013 | 0.251 (187)             | 0.256 (2,331)             | 0.341 (258)            | 0.305 (2,329)            |
|                             | 2015 | 0.277 (108)             | 0.237 (1,555)             | 0.342 (184)            | 0.298 (1,533)            |
|                             | 2011 | 0.200 (209)             | 0.159 (2,679)             | 0.283 (275)            | 0.318 (2,455)            |
| Sweating                    | 2013 | 0.171 (187)             | 0.212 (2,331)             | 0.368 (258)            | 0.434 (2,329)            |
|                             | 2015 | 0.175 (108)             | 0.199 (1,555)             | 0.353 (184)            | 0.425 (1,533)            |
|                             | 2011 | 0.200 (209)             | 0.164 (2,679)             | 0.225 (275)            | 0.216 (2,455)            |
| Shortness of breath         | 2013 | 0.267 (187)             | 0.230 (2,331)             | 0.317 (258)            | 0.269 (2,329)            |
|                             | 2015 | 0.203 (108)             | 0.230 (1,555)             | 0.331 (184)            | 0.283 (1,533)            |
|                             | 2011 | 0.397 (209)             | 0.380 (2,679)             | 0.418 (275)            | 0.400 (2,455)            |
| Body pains                  | 2013 | 0.550 (187)             | 0.522 (2,331)             | 0.585 (258)            | 0.535 (2,329)            |
|                             | 2015 | 0.620 (108)             | 0.518 (1,555)             | 0.641 (184)            | 0.523 (1,533)            |
|                             | 2011 | 0.177 (209)             | 0.151 (2,679)             | 0.214 (275)            | 0.225 (2,455)            |
| Palpitation                 | 2013 | 0.240 (187)             | 0.196 (2,331)             | 0.267 (258)            | 0.277 (2,329)            |
|                             | 2015 | 0.175 (108)             | 0.195 (1,555)             | 0.309 (184)            | 0.259 (1,533)            |
|                             | 2011 | 0.076 (209)             | 0.053 (2,679)             | 0.065 (275)            | 0.066 (2,455)            |
| Shivers or convulsions      | 2013 | 0.080 (187)             | 0.088 (2,331)             | 0.108 (258)            | 0.088 (2,329)            |

|                                                     |      |                        |                          |                        |                          |
|-----------------------------------------------------|------|------------------------|--------------------------|------------------------|--------------------------|
|                                                     | 2015 | 0.064 (108)            | 0.066 (1,555)            | 0.065 (184)            | 0.073 (1,533)            |
|                                                     | 2011 | 0.191 (209)            | 0.155 (2,679)            | 0.167 (275)            | 0.182 (2,455)            |
| Pressure on bladder                                 | 2013 | 0.326 (187)            | 0.241 (2,331)            | 0.271 (258)            | 0.244 (2,329)            |
|                                                     | 2015 | 0.324 (108)            | 0.215 (1,555)            | 0.277 (184)            | 0.251 (1,533)            |
|                                                     | 2011 | 0.358 (209)            | 0.311 (2,679)            | 0.378 (275)            | 0.372 (2,455)            |
| Tiredness                                           | 2013 | 0.465 (187)            | 0.425 (2,331)            | 0.500 (258)            | 0.481 (2,329)            |
|                                                     | 2015 | 0.398 (108)            | 0.401 (1,555)            | 0.516 (184)            | 0.495 (1,533)            |
|                                                     | 2011 | 0.100 (209)            | 0.064 (2,679)            | 0.123 (275)            | 0.171 (2,455)            |
| Constipation                                        | 2013 | 0.122 (187)            | 0.099 (2,331)            | 0.217 (258)            | 0.222 (2,329)            |
|                                                     | 2015 | 0.120 (108)            | 0.099 (1,555)            | 0.206 (184)            | 0.200 (1,533)            |
|                                                     | 2011 | 0.047 (209)            | 0.034 (2,679)            | 0.061 (275)            | 0.038 (2,455)            |
| Nosebleeds                                          | 2013 | 0.058 (187)            | 0.049 (2,331)            | 0.042 (258)            | 0.045 (2,329)            |
|                                                     | 2015 | 0.064 (108)            | 0.038 (1,555)            | 0.038 (184)            | 0.039 (1,533)            |
|                                                     | 2011 | 0.277 (209)            | 0.201 (2,679)            | 0.276 (275)            | 0.242 (2,455)            |
| Blood pressure                                      | 2013 | 0.374 (187)            | 0.303 (2,331)            | 0.395 (258)            | 0.331 (2,329)            |
|                                                     | 2015 | 0.342 (108)            | 0.286 (1,555)            | 0.418 (184)            | 0.352 (1,533)            |
| Age                                                 | 2011 | 60.79 ± 3.473<br>(209) | 54.81 ± 4.264<br>(2,679) | 59.38 ± 3.160<br>(275) | 53.81 ± 3.930<br>(2,455) |
| Years of education<br>completed                     | 2011 | 10.85 ± 2.682<br>(207) | 11.55 ± 3.221<br>(2,640) | 11.10 ± 3.000<br>(266) | 11.86 ± 2.886<br>(2,429) |
| Higher Education                                    | 2011 | 0.081 (209)            | 0.101 (2,679)            | 0.109 (275)            | 0.127 (2,455)            |
| Number of adults<br>living in the same<br>household | 2011 | 2.990 ± 1.263<br>(209) | 3.417 ± 1.422<br>(2,679) | 2.974 ± 1.349<br>(275) | 3.345 ± 1.463<br>(2,455) |
| Living in a large city                              | 2011 | 0.076 (209)            | 0.067 (2,679)            | 0.072 (275)            | 0.074 (2,455)            |
| Living in a rural area                              | 2011 | 0.468 (209)            | 0.505 (2,679)            | 0.48 (275)             | 0.444 (2,455)            |
| Disability                                          | 2011 | 0.291 (209)            | 0.215 (2,679)            | 0.24 (275)             | 0.174 (2,455)            |
| Permanent<br>employment                             | 2011 | 0.267 (209)            | 0.378 (2,679)            | 0.149 (275)            | 0.374 (2,455)            |
| Inactive                                            | 2011 | 0.411 (209)            | 0.191 (2,679)            | 0.48 (275)             | 0.304 (2,455)            |
| Higher education of<br>father                       | 2011 | 0.014 (209)            | 0.029 (2,679)            | 0.029 (275)            | 0.040 (2,455)            |
| General trust                                       | 2011 | 0.162 (209)            | 0.113 (2,679)            | 0.12 (275)             | 0.135 (2,455)            |
| Trust towards<br>Parliament                         | 2011 | 0.186 (209)            | 0.116 (2,679)            | 0.203 (275)            | 0.123 (2,455)            |
| Health benefits                                     | 2011 | 0.043 (209)            | 0.027 (2,679)            | 0.003 (275)            | 0.032 (2,455)            |
| High energy                                         | 2011 | 0.411 (209)            | 0.507 (2,679)            | 0.44 (275)             | 0.547 (2,455)            |

Note: For continuous/categorical variables mean ± standard deviation is shown, for binary variables – a frequency of positive answers. In both cases n (number of non-missing observations) – follows in brackets.
